# Supplementary figures and images for: Neurofilament light oligomers in neurodegenerative diseases: quantification by homogeneous immunoassay in cerebrospinal fluid
Source: PubMed Central journal article supplement — BMJ Neurol Open. 2023 Feb 27;5(1):e000395. doi: 10.1136/bmjno-2022-000395 (PMC9972422; doi:10.1136/bmjno-2022-000395), 2023-02-27

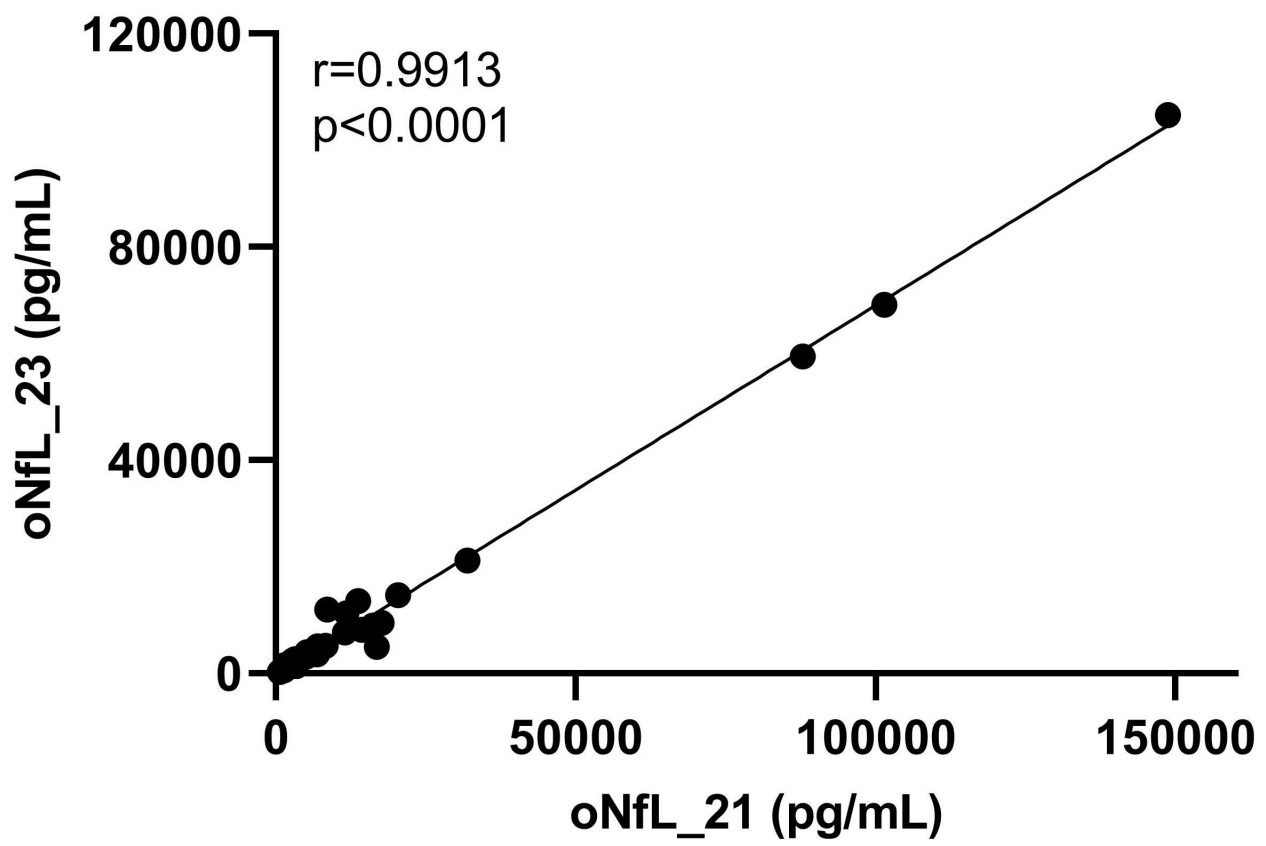

Supplement: bmjno-2022-000395supp001.pdf [file bmjno-2022-000395supp001.pdf]
